# Supplementary material for: Quantifying the potential benefits of risk-mitigation strategies on future flood losses in Kathmandu Valley, Nepal
Source: Copernicus journal article supplement (doi:10.5194/nhess-23-711-2023), 2023-02-21
Supplement: Supplementary file 1 [file nhess-23-711-2023-supplement.pdf]

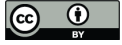

*Supplement of*

## **Quantifying the potential benefits of risk-mitigation strategies on future flood losses in Kathmandu Valley, Nepal**

**Carlos Mesta et al.**

*Correspondence to:* Carmine Galasso (c.galasso@ucl.ac.uk)

The copyright of individual parts of the supplement might differ from the article licence.

## Supplementary Material

**Table S1.** List of acronyms used in this work

| Acronym | Description                                       |
|---------|---------------------------------------------------|
| DRR     | disaster risk reduction                           |
| A       | adobe                                             |
| BSM     | brick/stone masonry with mud mortar               |
| BSC     | brick/stone masonry with cement mortar            |
| W       | wood-frame                                        |
| RC-CCP  | current-construction-practice reinforced concrete |
| RC-WDS  | well-designed reinforced concrete                 |
| RM      | reinforced masonry                                |

**Table S2.** Mean loss metrics for Scenario A, and absolute changes to these metrics in Scenarios B, C, and D, disaggregated by district

| Flooding occurrence | Metric                             | District                           | Scenario A  | Scenario B  | Scenario C  | Scenario D  |             |
|---------------------|------------------------------------|------------------------------------|-------------|-------------|-------------|-------------|-------------|
| 100-year            | Mean absolute financial losses (€) | Bhaktapur                          | 62,253,439  | +8,617,871  | -6,306,202  | +9,605,264  |             |
|                     |                                    | Kathmandu                          | 345,346,326 | +57,348,232 | -51,220,080 | +32,270,581 |             |
|                     |                                    | Lalitpur                           | 65,333,200  | +8,687,941  | -5,757,517  | +10,815,200 |             |
|                     | Mean loss ratio                    | Bhaktapur                          | 3.5%        | -0.09%      | -0.81%      | -0.84%      |             |
|                     |                                    | Kathmandu                          | 2.7%        | -0.07%      | -0.80%      | -0.82%      |             |
|                     |                                    | Lalitpur                           | 2.4%        | -0.02%      | -0.49%      | -0.52%      |             |
|                     | 1000-year                          | Mean absolute financial losses (€) | Bhaktapur   | 89,654,403  | +12,377,766 | -5,258,360  | +18,393,467 |
|                     |                                    |                                    | Kathmandu   | 576,162,142 | +83,341,425 | -56,444,738 | +88,865,127 |
|                     |                                    |                                    | Lalitpur    | 108,976,618 | +12,182,617 | -4,690,669  | +23,241,568 |
| Mean loss ratio     |                                    | Bhaktapur                          | 5.0%        | -0.13%      | -1.0%       | -1.0%       |             |
|                     |                                    | Kathmandu                          | 4.6%        | -0.20%      | -1.1%       | -1.2%       |             |
|                     |                                    | Lalitpur                           | 4.0%        | -0.11%      | -0.66%      | -0.74%      |             |

**Table S3.** Mean loss metrics for Scenario A, and absolute changes to these metrics in Scenarios B, C, and D, disaggregated by income level

| Flooding occurrence | Metric                             | Income level | Scenario A  | Scenario B  | Scenario C  | Scenario D  |
|---------------------|------------------------------------|--------------|-------------|-------------|-------------|-------------|
| 100-year            | Mean absolute financial losses (€) | Low          | 38,592,710  | +18,097,384 | -6,774,800  | +2,259,014  |
|                     |                                    | Middle       | 103,189,196 | +23,146,134 | -11,400,874 | +14,191,417 |
|                     |                                    | High         | 331,151,059 | +33,410,526 | -45,108,125 | +36,240,614 |
|                     | Mean loss ratio                    | Low          | 2.1%        | +0.10%      | -0.88%      | -0.90%      |
|                     |                                    | Middle       | 2.4%        | -0.08%      | -0.71%      | -0.73%      |
|                     |                                    | High         | 3.0%        | -0.04%      | -0.69%      | -0.72%      |
| 1000-year           | Mean absolute financial losses (€) | Low          | 60,564,250  | +25,800,358 | -7,288,996  | +7,639,070  |
|                     |                                    | Middle       | 162,179,628 | +35,446,740 | -11,381,018 | +29,947,118 |
|                     |                                    | High         | 552,049,285 | +46,654,710 | -47,723,753 | +92,913,974 |
|                     | Mean loss ratio                    | Low          | 3.3%        | +0.06%      | -1.3%       | -1.3%       |
|                     |                                    | Middle       | 3.7%        | -0.14%      | -1.0%       | -1.0%       |
|                     |                                    | High         | 5.0%        | -0.15%      | -0.94%      | -1.0%       |

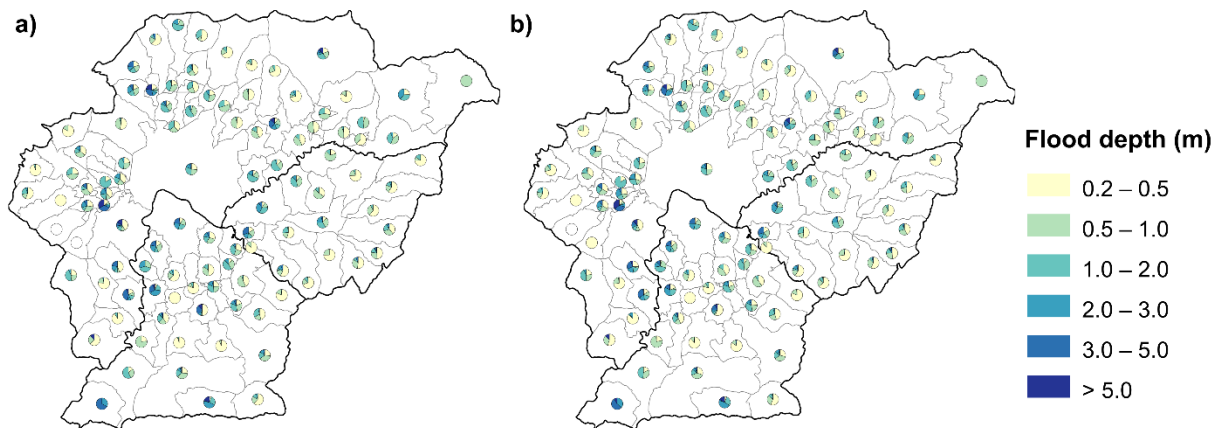

**Figure S1.** Expected proportions of buildings within various depth ranges of the 100-year floodplain for a) Scenarios A, C, D, and b) Scenario B.

Scenarios A, C, and D yield identical results, since the flood-hazard-informed land-use planning imposed as part of Scenarios C and D means that the expected number of buildings within the floodplain in 2031 (Scenarios C, D) remains limited to 2021 levels (Scenario A).

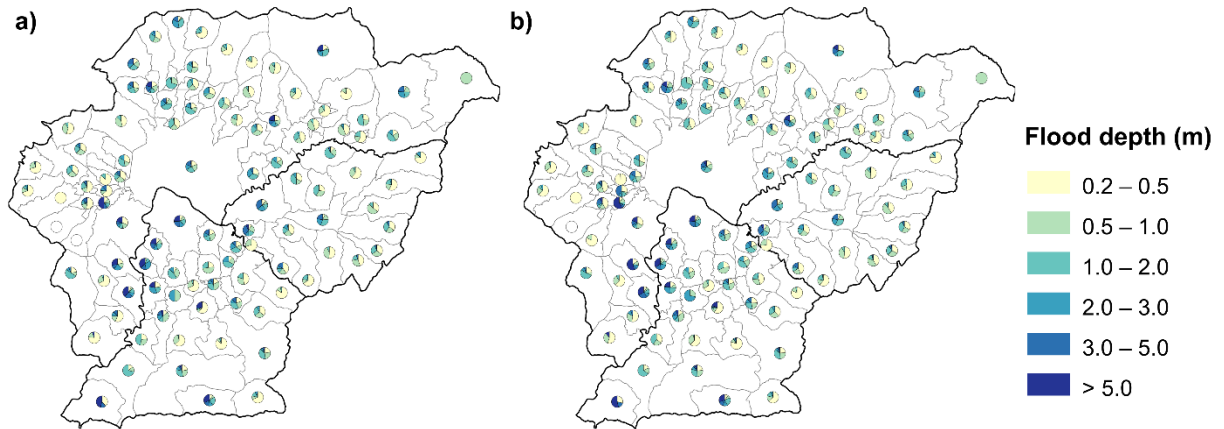

**Figure S2.** Expected proportions of buildings within various depth ranges of the 1000-year floodplain for a) Scenarios A, C, D, and b) Scenario B.

Scenarios A, C, and D yield identical results, since the flood-hazard-informed land-use planning imposed as part of Scenarios C and D means that the expected number of buildings within the floodplain in 2031 (Scenarios C, D) remains limited to 2021 levels (Scenario A).
